# Supplementary material for: Palaeoceanographic changes in Hornsund Fjord (Spitsbergen, Svalbard) overthe last millennium: new insights from ancient DNA
Source: Copernicus journal article supplement (doi:10.5194/cp-12-1459-2016), 2016-07-11
Supplement: Supplementary file 1 [file Table S1.xlsx]

## Sheet: Table S1
Species	Sediment depth [cm]
	0	1	2	5	9	10	13	17	20	25	29	30	33	37	40	41	45	49	50	53	57	60	61	65	69	70	73	75	77	80	85	89	90	93	97	100	101	105	109	110	113	117	120	121	125	129	130	133	137
Adercotryma glomerata (Brady, 1878)	1	4	12	12	12	10	2	10	0	0	0	0	0	0	0	0	1	1	0	1	1	0	0	1	1	3	0	0	6	0	3	2	3	2	2	4	1	3	1	7	4	2	2	0	6	0	4	3	2
Ammodiscus sp.	0	0	0	0	0	0	0	0	0	0	0	0	0	0	0	0	0	0	0	0	0	0	0	0	0	0	0	0	0	0	0	0	0	0	0	0	0	0	0	0	0	0	0	0	0	0	0	0	0
Ammotium cassis (Parke, 1870)	2	3	0	3	0	6	2	0	6	0	5	0	0	0	0	1	1	0	4	2	2	2	3	1	1	1	0	0	0	0	0	0	0	0	0	0	1	0	0	0	0	0	0	0	2	0	0	1	2
Angulogerina fluens (Todd, 1948)	0	0	0	0	0	1	0	0	0	0	0	0	0	0	0	0	0	0	0	0	0	0	0	0	0	0	0	0	0	0	0	0	0	0	0	0	0	0	0	0	0	0	0	0	0	0	0	0	0
Astrononion gallowayi (Loeblich & Tappan, 1953)	4	0	4	1	4	4	0	2	2	2	1	4	1	3	4	1	0	0	2	1	0	5	5	1	2	2	0	10	0	3	2	0	1	1	0	4	0	0	0	1	1	1	1	3	2	1	0	1	0
Bolivina pseudopunctata (Höglund, 1947)	1	4	0	0	0	0	0	0	0	0	0	4	0	2	0	1	0	0	2	0	0	0	0	0	0	1	0	0	0	1	0	0	0	0	0	2	0	0	0	0	0	0	0	0	0	0	1	0	0
Buccella frigida (Cushman, 1921)	36	50	25	24	25	74	20	33	34	2	1	6	0	5	8	1	1	7	16	4	10	5	5	23	7	12	5	16	3	11	13	8	6	4	0	16	10	20	9	6	14	8	8	9	16	12	23	13	8
Bucella tenerrima (Bandy, 1950)	0	0	1	0	1	0	1	1	0	0	0	0	0	0	0	0	0	0	0	0	0	0	0	0	0	0	0	0	0	0	0	0	0	0	0	1	0	0	0	0	0	0	0	0	0	0	1	0	0
Bucella sp.	0	0	0	0	0	0	0	0	0	1	1	0	0	1	0	1	0	0	0	0	0	0	0	0	2	0	1	0	0	0	1	0	0	2	0	0	0	0	0	0	0	0	0	0	0	0	0	0	0
Cassidulina reniforme (Norvang, 1945)	133	191	89	134	89	136	56	109	94	86	80	140	85	93	8	105	55	68	62	60	93	82	82	45	83	54	40	72	58	18	85	94	83	168	64	60	49	56	56	57	97	101	78	70	52	81	82	58	60
Cibicidoies lobatulus (Walker & Jacob, 1798)	19	18	9	16	9	22	5	8	68	12	27	70	13	13	44	34	37	34	82	26	18	24	24	20	26	13	14	48	36	33	20	9	19	10	24	80	25	20	36	27	32	48	34	42	56	19	28	45	11
Cibicides sp.	0	0	0	0	0	0	0	0	0	0	0	0	0	0	0	0	0	0	0	0	0	0	0	0	0	0	0	0	0	0	0	0	0	0	0	0	0	0	0	0	0	0	0	0	0	0	0	0	0
Cornuspira involvens (Reuss, 1884)	0	0	0	0	0	0	0	0	2	0	0	0	0	0	0	0	0	0	0	0	0	0	0	0	0	0	0	0	0	0	0	0	0	0	0	0	0	0	0	0	0	0	0	0	0	0	0	0	0
Cribrostomoides crassimargo (Norman, 1892)	3	18	33	59	33	50	34	71	2	23	38	4	23	14	32	33	37	28	26	17	29	17	17	23	40	23	17	22	29	11	5	15	11	20	24	14	33	18	11	22	14	3	29	6	30	6	42	29	51
Cribrostomoides sp.	0	0	0	0	1	0	0	0	0	0	0	0	0	0	0	0	0	0	0	0	0	0	0	0	0	0	0	0	0	0	0	0	0	0	0	2	0	0	0	0	0	0	0	0	0	0	0	0	0
Eggerella advena (Cushman, 1922)	0	9	1	2	1	0	1	1	0	0	1	0	0	2	0	0	0	0	0	1	0	1	1	0	2	0	0	0	0	1	0	0	1	0	0	0	0	0	0	0	0	0	0	2	0	0	2	1	0
Elphidium albiumbilicatum (Weiss, 1954)	0	0	6	4	6	0	0	0	0	0	1	1	2	4	0	0	0	0	2	1	2	5	5	0	0	4	2	0	1	3	0	1	1	0	0	0	2	0	0	1	1	1	0	0	2	2	1	0	1
Elphidium asklundi (Brotzen, 1943)	0	0	0	0	0	2	0	0	0	0	0	0	0	0	0	0	0	0	0	0	0	0	0	0	0	0	0	0	0	0	1	4	0	0	2	2	0	2	1	0	0	0	0	0	0	0	0	0	0
Elphidium bartletti (Cushman,1933)	4	0	4	1	4	4	0	1	0	2	1	0	0	1	4	0	0	0	0	1	2	1	1	7	1	6	1	10	2	24	16	0	2	3	7	8	1	1	0	2	0	1	6	1	4	1	0	3	1
Elphidium excavatum (Cushman, 1930)	291	367	72	199	72	126	166	174	78	130	176	120	209	122	156	116	163	126	190	126	312	113	113	176	183	166	89	146	146	262	203	177	230	166	171	124	149	122	177	102	199	138	142	151	170	210	159	139	126
Elphidium frigidum (Cushman, 1933)	0	0	1	0	1	0	0	0	0	0	0	0	0	0	0	0	0	0	0	0	1	0	0	0	0	1	0	0	0	0	0	0	1	0	0	0	0	0	0	1	0	0	1	0	0	0	0	0	0
Elphidium orbiculare (Brady, 1881)	0	0	0	0	0	0	0	0	0	0	0	0	0	0	0	0	0	0	0	0	0	0	0	0	1	0	0	0	0	1	0	1	0	0	0	0	0	0	0	0	1	0	0	0	0	1	0	0	1
Elphidium subarcticum (Cushman, 1944)	0	0	0	0	0	0	0	0	2	0	0	0	0	0	4	0	0	0	0	0	0	0	0	0	0	0	0	2	0	0	0	0	0	0	0	0	1	0	0	0	0	0	0	0	2	0	0	0	0
Elphidium sp.	0	0	0	0	0	0	1	0	0	0	0	0	0	1	0	0	0	0	0	0	1	0	0	0	0	0	1	0	2	3	0	0	0	0	0	0	2	2	1	0	1	0	3	0	0	1	0	2	0
Epistominella exigua (Brady, 1884)	0	0	0	0	0	0	0	2	0	0	0	0	0	0	0	0	0	0	0	0	0	0	0	0	0	0	0	0	0	0	0	0	0	0	0	0	0	0	0	0	0	0	0	0	0	0	0	0	0
Fissurina laevigata (Reuss, 1850)	1	0	0	0	0	0	0	0	0	0	0	0	0	0	0	0	0	0	0	0	0	0	0	0	0	0	0	0	0	0	0	0	0	0	0	0	0	0	0	0	0	0	0	0	0	0	0	0	0
Fissurina marginata (Montagu, 1803)	0	0	0	2	0	0	0	0	0	0	0	0	0	0	0	1	0	1	0	0	0	0	0	0	0	1	0	0	1	0	0	1	1	1	0	0	1	0	0	0	3	0	0	0	0	1	1	0	0
Fissurina ventricosa (Silvestri, 1904)	0	0	0	0	0	0	0	0	0	0	0	0	0	0	0	0	0	0	0	0	0	0	0	0	0	0	0	0	0	0	0	0	0	0	0	0	0	0	0	1	0	0	0	0	0	0	0	0	0
Fursenkoina fusiformis (Williamson, 1858)	0	0	0	0	0	0	0	0	0	0	0	0	0	0	0	0	0	0	0	0	0	0	0	0	0	0	0	0	0	0	0	0	0	0	0	0	0	0	0	0	0	0	0	0	0	0	0	0	0
Glandulina laevigata (d'Orbigny, 1846)	0	0	0	0	0	0	0	0	0	0	0	0	0	0	0	0	0	0	0	0	0	0	0	0	0	0	0	0	0	0	0	0	0	0	0	0	0	0	0	0	0	0	0	0	0	0	0	0	0
Globigerina spp	0	0	0	0	0	0	0	0	0	0	0	0	0	0	0	0	0	0	0	0	0	0	0	0	0	0	0	0	0	0	0	0	0	0	0	0	0	0	0	0	0	0	0	0	0	0	0	0	0
Globobulimina auriculata (Höglund, 1947)	0	0	1	0	2	4	0	0	0	0	0	0	0	1	8	0	0	1	0	0	0	1	1	0	1	1	0	2	0	0	0	0	0	0	0	0	0	0	0	0	0	0	0	0	0	1	0	0	0
Globobulimina turgida (Bailey, 1851)	0	0	0	0	0	0	0	0	0	0	0	0	0	0	4	0	0	0	0	0	0	0	0	0	0	0	0	0	0	0	0	0	0	0	0	0	0	0	0	0	0	0	0	0	0	0	0	0	0
Guttulina glacialis (Cushman & Ozawa, 1930)	0	0	0	0	0	0	0	0	0	0	0	0	0	0	0	0	0	0	0	0	0	0	0	0	0	0	0	0	0	0	0	0	0	0	0	0	0	0	0	0	0	0	0	0	0	0	0	0	0
Hyalinea sp	0	0	0	0	0	2	0	0	0	0	0	0	0	0	0	0	0	0	0	0	0	0	0	0	0	0	0	2	0	0	0	0	0	0	0	0	0	0	0	0	0	0	0	0	0	0	0	0	0
Islandiella spp	9	13	14	20	14	60	14	18	56	7	3	42	1	7	24	2	2	1	12	11	5	3	3	12	10	12	9	28	12	20	12	10	12	10	6	28	15	13	21	17	17	11	3	8	38	2	17	11	14
Lagena gracilis (Williamson, 1848)	0	0	0	0	0	0	0	0	0	2	0	0	0	0	0	0	0	0	0	0	0	0	0	0	0	0	0	0	0	0	0	0	0	0	0	0	0	0	0	0	0	0	0	0	0	0	0	0	0
Lagena laevis (Montagu, 1803)	0	0	0	0	0	0	0	0	0	0	0	0	0	0	0	0	0	0	0	0	0	0	0	0	0	0	0	0	0	0	0	0	0	0	0	0	0	0	0	0	0	0	0	0	0	0	0	0	0
Lagena sp.	0	0	0	0	0	0	0	0	0	0	0	0	0	0	0	0	0	0	0	0	0	0	0	0	0	0	0	0	0	0	1	0	0	0	0	0	0	0	0	0	0	0	0	0	0	0	0	0	0
Nonionellina auricula (Heron-Allen & Earland, 1930)	0	0	1	0	1	0	0	1	0	0	0	0	0	0	0	0	0	2	0	0	0	1	1	0	0	3	0	0	0	0	0	0	0	0	0	0	0	0	0	0	0	0	0	1	0	0	0	0	0
Nonionellina labradorica (Brady, 1884)	34	42	22	28	22	64	9	29	114	35	16	78	17	22	60	53	36	63	92	75	49	40	40	59	25	43	17	62	18	46	32	14	25	25	21	106	40	50	72	56	55	31	0	29	64	25	45	33	28
Nonionellina sp.	0	0	2	3	2	0	0	0	0	0	0	0	0	0	0	0	0	0	0	0	0	0	0	0	0	0	0	0	0	0	0	0	1	0	1	0	0	0	0	0	0	0	0	0	0	0	0	0	0
Oolina costata (Williamson, 1958)	0	0	0	0	0	0	0	0	0	0	0	0	0	0	0	0	0	0	0	0	0	0	0	0	2	1	0	0	0	0	0	0	0	0	0	0	1	0	0	0	0	0	0	0	0	0	0	0	0
Oolina melo (d'Orbigny, 1839)	0	0	0	0	0	0	0	0	2	0	0	0	0	0	0	0	0	0	0	0	0	0	0	0	0	0	0	2	0	0	0	0	0	0	0	0	0	1	0	0	0	0	0	0	0	0	0	0	0
Parafissurina fusuliformis (Loeblich & Tappan, 1953)	0	1	0	0	0	2	0	0	2	0	0	0	0	0	0	0	0	0	0	0	0	0	0	0	0	0	0	0	0	0	0	0	0	0	0	0	0	0	0	0	0	0	0	0	0	0	0	0	0
Pullenia bulloides (d'Orbigny, 1846)	0	0	0	0	0	0	0	0	0	0	0	0	0	1	0	1	0	0	0	0	0	0	0	0	0	0	0	0	0	0	0	0	0	0	0	0	0	1	1	0	0	0	0	0	0	0	0	0	0
Pyrgo williamsoni (Silvestri, 1923)	1	3	0	0	0	4	1	0	0	0	0	0	2	0	4	0	0	0	0	1	2	0	0	0	0	1	0	0	0	1	0	0	0	0	0	1	0	0	0	0	0	0	1	0	0	0	0	0	0
Quinqueloculina agglutinata (Cushman, 1917)	0	1	0	0	0	0	0	0	0	0	0	0	0	0	0	0	0	0	0	3	2	0	0	0	1	0	0	0	0	0	0	0	0	0	0	0	0	0	0	0	0	0	0	0	0	0	1	0	0
Quinqueloculina arctica (Cushman, 1933)	7	2	0	2	0	6	1	0	0	0	1	0	0	1	0	0	0	0	0	4	4	2	2	1	0	1	1	4	0	1	0	0	1	0	0	0	0	0	0	0	0	0	0	0	0	0	0	0	0
Quinqueloculina seminulum (Linné, 1758)	35	24	1	0	1	0	1	0	4	1	1	2	0	0	0	0	0	0	0	0	0	2	2	0	0	0	2	0	0	0	0	0	0	1	0	0	0	0	0	0	0	0	0	0	0	0	1	0	0
Quinqueloculina stalkeri (Loeblich & Tappan, 1953)	21	15	3	6	3	6	0	4	18	4	6	4	7	2	0	2	2	2	8	1	4	7	7	6	1	2	0	0	0	0	1	0	0	1	0	0	0	0	0	0	0	1	0	0	0	2	0	0	0
Quinqueloculina sp.	0	3	0	0	0	2	2	0	0	0	1	0	0	0	0	0	0	0	0	0	2	0	0	0	0	1	0	0	0	0	0	0	0	0	0	0	0	0	0	0	0	0	0	0	0	0	0	0	0
Recurvoides turbinatus (Brady, 1881)	35	49	2	4	2	6	0	0	2	1	0	0	0	1	0	0	0	0	2	0	0	1	1	1	3	3	0	0	3	0	0	0	0	0	0	6	0	0	0	1	0	0	2	1	10	1	2	0	2
Reophax scorpiurus (Montfort, 1808)	1	0	0	0	0	0	0	1	0	0	0	0	0	0	0	0	0	0	0	0	1	0	0	0	0	0	0	0	0	0	2	0	0	0	0	0	0	0	0	0	1	0	0	0	0	0	1	0	0
Reophax subfusiformis (Earland, 1933)	0	0	1	0	1	0	0	0	0	0	0	0	0	0	0	0	0	0	0	0	0	0	0	0	0	0	0	0	0	0	0	0	0	0	0	0	0	0	0	0	0	0	0	0	0	0	0	0	0
Reophax sp.	1	9	1	0	1	0	0	0	0	0	0	0	0	0	0	0	0	0	0	0	0	0	0	0	0	0	0	0	0	0	0	0	0	0	0	0	0	0	0	0	0	0	0	0	0	0	1	0	0
Robertina arctica (d'Orbigny, 1846)	0	0	0	0	0	0	0	0	0	0	0	1	0	0	0	0	0	0	0	0	0	0	0	0	0	0	0	0	0	0	0	0	0	0	0	0	0	0	0	1	0	0	0	0	0	0	0	0	0
Rosalina vilardeboana (d'Orbigny, 1839)	0	0	2	0	2	0	0	0	0	0	0	0	0	0	0	0	0	0	0	0	0	0	0	0	0	0	0	0	1	0	0	0	0	0	0	0	0	0	0	0	0	0	0	0	0	0	0	0	0
Spiroplectammina biformis (Parker & Jones, 1865)	54	80	0	8	0	0	2	2	0	3	2	0	0	3	0	3	2	1	0	0	9	3	3	0	5	5	6	0	2	0	2	3	2	0	0	0	3	1	0	1	0	0	0	1	0	3	0	2	5
Spiroplectammina earlandi (Parker, 1952)	4	23	1	9	1	0	1	2	0	2	0	0	0	0	0	0	0	2	0	2	4	1	1	2	4	3	0	0	0	0	0	0	0	0	1	0	0	1	0	0	0	0	2	0	0	0	2	0	0
Spiroplectammina sp.	7	10	0	4	0	1	2	2	1	1	2	0	4	2	4	2	1	0	0	0	3	2	7	0	6	11	0	0	3	2	1	2	3	0	0	0	0	1	0	3	0	0	3	0	0	1	1	0	1
Stainfrothia feylingi (Czjzek, 1848)	0	6	0	0	0	1	0	1	0	0	0	0	0	0	0	0	0	0	0	0	0	0	0	0	0	1	0	0	0	0	0	0	0	0	0	0	0	0	1	0	0	0	0	0	0	0	0	0	0
Stainforthia loeblichi (Feyling-Hanssen, 1954)	0	0	0	1	0	0	1	0	0	0	0	0	0	0	0	0	0	0	0	0	0	0	0	0	0	0	0	0	1	0	0	1	0	0	1	0	0	0	0	0	0	0	0	1	0	0	0	0	0
Stainforthia sp.	0	0	1	0	1	0	0	1	0	0	0	0	0	0	0	0	0	0	0	0	0	0	0	1	0	1	0	0	0	0	0	0	0	0	0	0	0	0	0	0	0	0	0	0	0	0	0	0	0
Trifarina fluens (Todd, 1948)	0	0	1	0	1	1	0	0	0	0	0	0	0	0	0	0	0	0	0	0	0	0	0	0	0	0	0	0	0	1	1	0	0	0	1	0	0	1	0	1	1	1	0	0	0	0	0	1	0
Triloculina frigida (Lagoe, 1977)	5	1	0	0	0	0	0	0	0	0	0	0	0	0	0	0	0	0	1	0	0	0	0	0	0	0	0	0	0	0	0	0	0	0	0	0	0	0	0	0	0	0	0	0	0	0	0	0	0
Triloculina trihedra (Loeblich & Tappan, 1953)	0	4	0	0	0	2	1	0	0	0	0	0	0	0	0	0	0	0	0	0	0	0	0	1	2	1	0	0	0	0	0	0	0	1	0	0	0	0	0	0	0	0	0	0	0	0	0	0	0
Triloculina sp.	0	0	0	0	0	0	0	0	0	0	0	0	0	0	0	0	0	0	0	0	0	0	0	0	0	0	0	0	0	0	0	0	0	0	0	0	0	0	0	0	0	0	0	0	0	0	0	0	0
Trochammina rotaliformis (Heron-Allen & Earland, 1911)	0	0	0	0	0	0	0	0	0	0	1	0	0	0	0	0	0	1	0	0	1	0	0	2	2	4	0	0	0	0	0	0	0	1	0	0	0	3	0	0	0	0	0	0	0	0	0	0	0
[truncated: 25 more columns]
