# Supplementary material for: Palaeoceanographic changes in Hornsund Fjord (Spitsbergen, Svalbard) overthe last millennium: new insights from ancient DNA
Source: Copernicus journal article supplement (doi:10.5194/cp-12-1459-2016), 2016-07-11
Supplement: Supplementary file 2 [file Table S2.xlsx]

## Sheet: Arkusz4
Assignment	Sediment depth [cm]
	0	10	20	30	40	50	75	100	125	150	175	200
Globothalamea	63	236	1041	142	911	65	43	11	26	77	66	43
Globothalamea	11	45	17	0	85	582	613	0	11	38	31	38
Globothalamea	0	0	18	0	3	0	0	0	0	0	0	0
Globothalamea	0	0	0	0	23	48	0	0	0	0	0	0
Globothalamea	12	21	15	0	699	1476	24	0	15	19	22	0
Globothalamea	0	0	0	0	67	37	23	0	0	0	0	0
Globothalamea	32	84	47	14	1008	2246	194	12	23	70	83	75
Globothalamea	1187	2469	60	0	1184	2094	100	12	13	63	458	492
Globothalamea	0	0	0	0	72	142	60	0	0	0	0	0
Globothalamea		92	35	51	239		14				16	13
Globothalamea|Globigerinida|Globigerinidae|Globigerinita glutinata	0	15	13	0	551	981	230	0	0	30	35	20
Globothalamea|Globigerinida|Globigerinidae|Globigerinita uvula	23	0	0	47	41	0	4	0	0	0	0	0
Globothalamea|Globigerinida|Globigerinidae|Globigerinita uvula					96	125	23
Globothalamea|Globigerinida|Globorotaliidae|Neogloboquadrina pachyderma	0	0	0	11	679	0	0	0	0	0	0	0
Globothalamea|Globigerinida|Globorotaliidae|Neogloboquadrina pachyderma	110	28	18	546	3477	51	52	12	0	30	22	25
Globothalamea|Robertinida|Robertinidae|Robertina sp	89	3280	2556	532	107	175	122	35	71	189	220	168
Globothalamea|Rotaliida	11064	2445	87	73	185	243	89	82	206	192	22417	515
Globothalamea|Rotaliida	22681	440	131	471	339	462	124	144	376	420	43264	986
Globothalamea|Rotaliida	11	0	0	0	91	194	111	0	0	0	0	0
Globothalamea|Rotaliida|Bolivinidae|Bolivina	0	0	0	0	0	0	17	0	0	0	0	0
Globothalamea|Rotaliida|Bolivinidae|Bolivina	0	0	0	0	0	20	0	0	0	0	0	0
Globothalamea|Rotaliida|Bolivinidae|Bolivina	0	17	0	0	488	993	65	0	0	21	14	11
Globothalamea|Rotaliida|Bolivinidae|Bolivina	0	0	0	0	23	53	0	0	0	0	0	0
Globothalamea|Rotaliida|Bolivinidae|Bolivina	0	0	0	0	47	130	0	0	0	0	0	0
Globothalamea|Rotaliida|Bolivinidae|Bolivina	0	0	0	0	0	14	0	0	0	0	0	0
Globothalamea|Rotaliida|Bolivinidae|Bolivina	25	34	30	0	1068	2061	42	0	30	45	49	46
Globothalamea|Rotaliida|Bolivinidae|Bolivina sp	127	271	99	38	6492	12462	306	55	110	259	293	269
Globothalamea|Rotaliida|Bolivinidae|Bolivina sp	0	0	0	0	54	123	0	0	0	0	0	0
Globothalamea|Rotaliida|Bolivinidae|Bolivina sp	0	0	0	0	51	97	0	0	0	0	0	0
Globothalamea|Rotaliida|Bolivinidae|Bolivina sp	0	0	0	0	115	203	0	0	0	0	0	0
Globothalamea|Rotaliida|Bolivinidae|Bolivina sp	0	0	0	0	60	237	119	0	0	0	0	0
Globothalamea|Rotaliida|Bolivinidae|Bolivina sp	0	0	0	0	331	587	0	0	0	0	14	0
Globothalamea|Rotaliida|Bolivinidae|Bolivina spathulata	15	26	19	12	856	1832	128	0	11	31	42	29
Globothalamea|Rotaliida|Bolivinidae|Bolivina subaenariensis	0	33	23	0	765	1366	27	13	19	23	43	17
Globothalamea|Rotaliida|Bolivinidae|Bolivina subaenariensis	0	0	0	0	18	41	0	0	0	0	0	0
Globothalamea|Rotaliida|Buliminidae|Bulimina aculeata	0	0	0	0	0	12	0	0	0	0	0	0
Globothalamea|Rotaliida|Buliminidae|Bulimina marginata	0	0	0	0	83	158	12	0	0	0	0	0
Globothalamea|Rotaliida|Buliminidae|Buliminella tenuata	105	237	128	59	3006	6665	602	55	95	209	215	175
Globothalamea|Rotaliida|Buliminidae|Gallitellia vivans	41	68	31	0	1455	2591	105	29	32	57	83	78
Globothalamea|Rotaliida|Buliminidae|Stainforthia	191	385	162	109	2918	5098	2390	3122	163	384	345	333
Globothalamea|Rotaliida|Buliminidae|Stainforthia	0	30	86	233	27	145	0	0	0	11	0	0
Globothalamea|Rotaliida|Buliminidae|Stainforthia sp	50713	4593	2479	1011	1958	3681	3389	966	1518	4119	66945	340225
Globothalamea|Rotaliida|Buliminidae|Stainforthia sp	12	35	0	0	19	25	218	286	0	31	31	25
Globothalamea|Rotaliida|Calcarinidae|Calcarina defrancii	287	585	320	147	8243	20472	4435	127	275	523	578	503
Globothalamea|Rotaliida|Cassidulinidae|Cassidulina laevigata	1244	2776	1521	989	1823	98838	127864	928	1579	2979	3055	2682
Globothalamea|Rotaliida|Cassidulinidae|Cassidulina laevigata	2549	5359	3082	1789	3603	177517	311196	1690	2774	5740	5562	5349
Globothalamea|Rotaliida|Cassidulinidae|Cassidulinoides sp	54	0	0	0	0	0	0	0	0	0	202	0
Globothalamea|Rotaliida|Cassidulinidae|Globocassidulina biora	1081	1503	699	519	1189	1653	1055	31921	21423	6914	4874	1503
Globothalamea|Rotaliida|Clade3	0	0	0	0	0	0	0	75	30	0	0	0
Globothalamea|Rotaliida|Clade3	12	191	199	190	142	159	27	0	22	50	49	41
Globothalamea|Rotaliida|Clade3	0	82	43	0	0	0	0	0	0	0	0	0
Globothalamea|Rotaliida|Clade3	0	0	0	0	67	116	0	0	0	0	0	0
Globothalamea|Rotaliida|Clade3	57	94	42	18	549	1768	1014	13	47	100	100	80
Globothalamea|Rotaliida|Clade3	0	32	26	0	898	1711	28	0	0	18	29	23
Globothalamea|Rotaliida|Clade3	139	2229	1430	2171	3599	512	281	67	115	275	299	248
Globothalamea|Rotaliida|Clade3	0	0	0	0	175	302	22	0	0	0	0	0
Globothalamea|Rotaliida|Clade3|Cibicidoides	96	231	130	0	4560	8295	409	40	92	228	257	204
Globothalamea|Rotaliida|Clade3|Cibicidoides	0	0	0	0	107	173	0	0	0	0	0	0
Globothalamea|Rotaliida|Clade3|Cibicidoides	63761	142	79	50	65	113	68	21	69	116	4468	1888
Globothalamea|Rotaliida|Clade3|Cibicidoides	0	0	0	0	0	17	0	0	0	0	0	0
Globothalamea|Rotaliida|Clade3|Cibicidoides	0	0	0	0	137	269	0	0	0	0	0	0
Globothalamea|Rotaliida|Clade3|Cibicidoides lobatulus	1543	2589	2027	481	948	2036	2538	611	489	2971	4052	273422
Globothalamea|Rotaliida|Clade3|Cibicidoides wuellerstorfi	2506	3600	1599	1212	2765	3795	2164	76529	71095	17232	11011	3296
Globothalamea|Rotaliida|Clade3|Epistominella arctica	0	0	0	0	383	703	0	0	0	0	0	13
Globothalamea|Rotaliida|Clade3|Epistominella arctica	0	0	0	0	21	35	0	0	0	0	0	0
Globothalamea|Rotaliida|Clade3|Epistominella exigua	2545	3107	1422	1039	2452	3625	2280	61835	57384	14337	10975	2881
Globothalamea|Rotaliida|Clade3|Epistominella exigua	0	0	0	0	0	14	0	0	0	0	0	0
Globothalamea|Rotaliida|Clade3|Epistominella sp	0	0	0	0	182	303	27	0	0	0	0	0
Globothalamea|Rotaliida|Clade3|Epistominella sp	71	139	70	12	2356	3794	96	23	68	108	160	110
Globothalamea|Rotaliida|Clade3|Epistominella sp	126	252	104	41	3834	7649	859	31	81	244	294	210
Globothalamea|Rotaliida|Clade3|Epistominella vitrea	0	25	18	0	91	125	0	0	0	0	0	0
Globothalamea|Rotaliida|Clade3|Epistominella vitrea	2147	3148	1419	1057	2266	3077	1807	68497	60863	14959	9570	2776
Globothalamea|Rotaliida|Clade3|Epistominella vitrea	0	42	38	0	0	0	0	0	0	0	0	0
Globothalamea|Rotaliida|Clade3|Hanzawaia sp	144	300	166	77	5430	10929	198	72	125	260	303	234
Globothalamea|Rotaliida|Clade3|Nonion sp	0	0	0	0	133	292	18	0	0	0	0	0
Globothalamea|Rotaliida|Clade3|Nonion sp	0	0	0	0	21	18	0	0	0	0	0	0
Globothalamea|Rotaliida|Clade3|Nonion sp	42	112	63	28	2087	4466	76	32	30	114	112	87
Globothalamea|Rotaliida|Clade3|Nonion sp	0	0	0	0	12	57	0	0	0	0	0	0
Globothalamea|Rotaliida|Clade3|Nonion sp	0	0	0	0	39	37	0	0	0	0	0	11
Globothalamea|Rotaliida|Clade3|Nonionella labradorica	0	36	28	0	0	1	0	1	0	0	0	0
Globothalamea|Rotaliida|Clade3|Nuttalides sp	0	60	0	70	197	0	0	0	0	0	0	0
Globothalamea|Rotaliida|Clade3|Nuttalides sp	16	1211	61	23	84	20	16	0	19	36	39	31
Globothalamea|Rotaliida|Clade3|Nuttalides umbonifera	509	0	0	0	0	0	0	0	20	12	1355	24
Globothalamea|Rotaliida|Clade3|Nuttalides umbonifera	0	0	0	0	0	12	0	0	0	0	0	0
Globothalamea|Rotaliida|Clade3|Oridorsalis umbonatus	10331	1943	1374	380	752	1408	1642	410	473	2058	16600	177688
Globothalamea|Rotaliida|Clade3|Pullenia subcarinata	3020	4333	2014	1494	3315	4366	2637	92084	90084	22924	13909	3957
Globothalamea|Rotaliida|Elphidiidae|Cribroelphidium frigidium	0	0	0	4	0	0	0	9	0	1	47	58
Globothalamea|Rotaliida|Elphidiidae|Cribroelphidium frigidium	0	0	0	0	0	0	0	1	0	0	0	0
Globothalamea|Rotaliida|Elphidiidae|Cribroelphidium frigidium	0	1	0	0	0	0	0	0	0	0	0	0
Globothalamea|Rotaliida|Elphidiidae|Elphidium macellum	0	0	0	0	16	46	52	46	0	0	0	0
Globothalamea|Rotaliida|Elphidiidae|Elphidium margaritaceum	0	0	0	0	0	16	0	0	0	0	0	0
Globothalamea|Rotaliida|Elphidiidae|Elphidium williamsoni	42	155	48	0	63	102	81	4722	56	126	155	99
Globothalamea|Rotaliida|Elphidiidae|Elphidium williamsoni	0	0	0	0	0	0	0	428	0	0	0	0
Globothalamea|Rotaliida|Elphidiidae|Haynesina depressa	0	0	0	0	0	14	11	0	0	0	0	0
Globothalamea|Rotaliida|Elphidiidae|Polystomella excavatum	15929	148752	3344	1270	690	1206	1061	392	524	1416	40200	2946
Globothalamea|Rotaliida|Elphidiidae|Polystomella excavatum	24	33	24	0	385	647	292	0	18	41	41	55
Globothalamea|Rotaliida|Elphidiidae|Polystomella excavatum	0	0	0	0	13	24	0	0	0	0	0	0
Globothalamea|Rotaliida|Glabratellidae	0	0	0	0	0	408	4	0	0	17	0	5
Globothalamea|Rotaliida|Glabratellidae|Buliminoides sp	0	11	12	0	317	660	43	0	0	14	0	0
Globothalamea|Rotaliida|Glabratellidae|Buliminoides sp	0	68	53	25	0	0	0	0	0	0	0	0
Globothalamea|Rotaliida|Glabratellidae|Glabratellina sp	0	0	0	0	59	117	0	0	0	0	0	0
Globothalamea|Rotaliida|Nummulitidae|Cycloclypeus carpenteri	59	86	49	33	840	1773	778	11	33	98	120	70
Globothalamea|Rotaliida|Nummulitidae|Operculina	0	0	0	0	0	0	0	11	0	0	0	0
Globothalamea|Rotaliida|Rosalinidae|Planorbulina mediterranensis	172	346	194	112	359	5682	6943	97	193	332	327	305
Globothalamea|Rotaliida|Rosalinidae|Planorbulina mediterranensis	105	186	102	50	608	3306	3514	35	107	218	213	211
Globothalamea|Rotaliida|Rosalinidae|Rosalina macropora	0	0	0	0	0	0	11	0	0	0	0	0
Globothalamea|Rotaliida|Rotaliidae|Ammonia sp	0	0	0	0	0	0	0	58	0	0	0	0
Globothalamea|Rotaliida|Rotaliida-X|Heterolepa praecincta					44	48
Globothalamea|Rotaliida|Uvigerinidae|Trifarina earlandii	730	1110	490	350	789	1073	664	15112	9291	4134	2920	1022
Globothalamea|Textulariida	8916	246	84	66	1182	1740	133	72	166	240	15870	415
Globothalamea|Textulariida	38	75	36	0	1005	1777	448	0	37	85	92	60
Globothalamea|Textulariida|Eggerellidae|Eggerella sp	0	0	0	0	208	326	0	0	0	0	0	0
Globothalamea|Textulariida|Eggerellidae|Eggerella sp	0	0	0	0	0	19	0	0	0	0	0	0
Globothalamea|Textulariida|Hormosinidae|Reophax	401	564	333	113	2792	26339	848	128	152	568	582	511
Globothalamea|Textulariida|Hormosinidae|Reophax	0	40	11	0	228	449	189	0	12	38	33	19
Globothalamea|Textulariida|Hormosinidae|Reophax	51	91	40	21	801	1366	380	13	37	80	107	72
Globothalamea|Textulariida|Hormosinidae|Reophax	0	0	0	0	183	361	38	0	0	0	0	0
Globothalamea|Textulariida|Hormosinidae|Reophax	0	0	0	0	0	0	0	17	12	0	0	0
Globothalamea|Textulariida|Hormosinidae|Reophax	106	191	108	57	3105	5633	544	45	95	194	210	166
Globothalamea|Textulariida|Hormosinidae|Reophax	0	0	0	0	26	44	0	0	0	0	0	0
Globothalamea|Textulariida|Hormosinidae|Reophax scorpiurus	6648	3302	60	40	106	131	75	32	95	137	11416	266
Globothalamea|Textulariida|Hormosinidae|Reophax sp	73640	25351	10645	843	1233	1650	505	547	1357	1357	148939	2893
Globothalamea|Textulariida|Hormosinidae|Reophax sp	0	0	0	0	32	52	0	0	0	0	0	0
Globothalamea|Textulariida|Hormosinidae|Reophax sp	0	0	0	0	98	169	13	0	0	0	0	0
Globothalamea|Textulariida|Hormosinidae|Reophax sp	11	29	0	0	753	1201	15	0	11	31	16	0
Globothalamea|Textulariida|Hormosinidae|Reophax spiculifer	0	0	0	0	0	0	11	0	0	0	0	0
Globothalamea|Textulariida|Spiroplectamminidae|Spiroplectammina sp	134263	279632	1738	783	1815	6303	2189	800	1432	3300	157456	8356
Globothalamea|Textulariida|Spiroplectamminidae|Spiroplectammina sp	0	0	0	0	1	0	0	0	0	0	0	0
Globothalamea|Textulariida|Textulariidae|Spirotextularia sp	697	1044	482	325	743	1024	644	17005	7840	3589	2584	943
Globothalamea|Textulariida|Textulariidae|Textularia gramen	44	116	51	15	1819	3024	95	22	50	102	103	96
Globothalamea|Textulariida|Textulariidae|Textularia sagittula	225	400	171	127	282	360	254	4879	2407	1287	851	357
Globothalamea|Textulariida|Textulariidae|Textularia sagittula	78	110	47	28	65	100	49	1062	641	353	237	101
Globothalamea|Textulariida|Textulariidae|Textularia sagittula	0	0	0	0	0	20	0	0	0	0	0	0
Globothalamea|Textulariida|Textulariidae|Textularia sagittula	0	15	0	0	0	0	0	0	0	0	0	0
Globothalamea|Textulariida|Textulariida-X|Cribrostomoides crassimargo	5545	308	172	271	235	8312	256	70	110	376	1673	5111
Globothalamea|Textulariida|Textulariida-X|Jadammina sp	587	14751	1741	2169	20138	503	474	174	256	568	585	529
Globothalamea|Textulariida|Textulariida-X|Leptohalysis scotti	388	642	345	176	4521	9007	2929	164	6212	696	696	631
Globothalamea|Textulariida|Textulariida-X|Leptohalysis scotti	0	0	0	0	33	72	0	0	0	0	0	0
Globothalamea|Textulariida|Trochamminidae|Trochammina hadai						5
Globothalamea|Textulariida|Trochamminidae|Trochammina pacifica	0	0	0	405	638	0	11	0	0	0	0	0
Globothalamea|Textulariida|Trochamminidae|Trochammina pacifica	0	0	0	0	34	53	12	0	0	0	0	0
Globothalamea|Textulariida|Trochamminidae|Trochammina pacifica	0	0	0	0	75	69	0	0	0	0	0	0
Monothalamea|Monothalamids	1996	101	49	283	2394	1084	2003	2211	54	119	1223	125
Monothalamea|Monothalamids|CladeA	35500	1729	915	454	1127	9123	962	20739	11440	5483	6135	5503
Monothalamea|Monothalamids|CladeA	0	51	0	0	0	0	0	0	0	0	0	0
Monothalamea|Monothalamids|CladeA	0	27	32	14	6	0	0	0	0	0	228	0
Monothalamea|Monothalamids|CladeA|allogromiid sp	11	213	132	36	25	11	0	0	13	0	18	0
Monothalamea|Monothalamids|CladeA|allogromiid sp	0	0	0	17	0	0	0	0	0	0	0	0
Monothalamea|Monothalamids|CladeA|allogromiid sp	0	26	62	38	0	0	0	0	0	0	0	0
Monothalamea|Monothalamids|CladeA|allogromiid sp	2004	669	480	157	547	42686	638	140	108	706	717	1611
Monothalamea|Monothalamids|CladeB|allogromiid sp	0	0	0	0	130	221	0	0	0	0	0	0
Monothalamea|Monothalamids|CladeB|allogromiid sp	0	26	11	0	462	671	0	0	0	11	26	16
Monothalamea|Monothalamids|CladeB|allogromiid sp	0	0	0	34	14	18	0	0	0	0	0	0
Monothalamea|Monothalamids|CladeB|allogromiid sp	0	0	0	0	83	139	0	0	0	0	12	0
Monothalamea|Monothalamids|CladeB|Bowseria sp	23	0	0	19	100	177	0	0	0	0	0	0
Monothalamea|Monothalamids|CladeB|Bowseria sp	0	0	0	21	15	17	0	0	0	0	0	0
Monothalamea|Monothalamids|CladeB|mudball	281	45	12	0	457	721	17	0	25	15	39	354
Monothalamea|Monothalamids|CladeB|mudball	0	0	0	0	148	253	66	0	0	0	0	0
Monothalamea|Monothalamids|CladeB|Psammosphaera sp	46	0	0	0	0	0	0	0	14	0	0	33
Monothalamea|Monothalamids|CladeBM	70	375	373	664	4516	9294	137	22	82	184	198	141
Monothalamea|Monothalamids|CladeBM|Bathysiphon	3007	4597	2245	1348	17451	30139	2524	145477	117051	24146	16302	6559
Monothalamea|Monothalamids|CladeBM|Bathysiphon	0	0	0	0	0	11	0	0	0	0	0	0
Monothalamea|Monothalamids|CladeBM|Bathysiphon argenteus	13	483	319	95	85	112	33	32	69	82	109	76
Monothalamea|Monothalamids|CladeBM|Bathysiphon argenteus	0	0	0	0	547	1114	0	0	0	0	0	0
Monothalamea|Monothalamids|CladeBM|Bathysiphon sp	26	52	32	0	1877	3411	28	0	20	60	70	30
Monothalamea|Monothalamids|CladeBM|Micrometula sp	118266	28438	6050	2779	65586	449882	6911	135731	112910	28487	25639	16033
Monothalamea|Monothalamids|CladeBM|Micrometula sp	2952	5466	3025	1271	196276	359986	3743	1589	3081	6556	6945	5161
Monothalamea|Monothalamids|CladeBM|Micrometula sp	0	0	0	0	0	21	0	0	0	0	0	0
Monothalamea|Monothalamids|CladeC|allogromiid|sp	0	49	551	64	14	0	0	0	0	13	0	17
Monothalamea|Monothalamids|CladeC|Cylindrogullmia alba	23	115	48	12	2065	3714	75	0	48	80	117	91
Monothalamea|Monothalamids|CladeC|Gloiogullmia sp	57	0	0	0	0	0	0	0	0	0	43	38
Monothalamea|Monothalamids|CladeC|Hippocrepinella sp	19	387	376	309	74	107	50	27	72	74	91	73
Monothalamea|Monothalamids|CladeC|silver saccamminid	23	951	1548	50	44	59	39	11	28	80	66	67
Monothalamea|Monothalamids|CladeC|silver saccamminid	0	0	0	0	753	1287	0	0	0	0	0	0
Monothalamea|Monothalamids|CladeC|Toxisarcon sp	1705	5393	2147	521	1062	2290	2740	612	418	3086	4942	307314
Monothalamea|Monothalamids|CladeC|saccamminid sp	45	8893	3708	108	144	164	103	59	122	159	213	128
Monothalamea|Monothalamids|CladeCX|Rhizammina sp	0	0	0	0	0	0	98	126	0	0	0	0
Monothalamea|Monothalamids|CladeCX|Rhizammina sp	0	0	0	0	28	77	23	0	0	0	0	0
Monothalamea|Monothalamids|CladeCX|Syringammina corbicula	0	12	0	0	0	0	0	0	0	0	0	0
Monothalamea|Monothalamids|CladeCX|Syringammina corbicula	0	0	0	0	37	104	25	0	0	0	0	0
Monothalamea|Monothalamids|CladeD|allogromiid|sp	11	22	11	0	14	32	23	0	11	21	626	703
Monothalamea|Monothalamids|CladeD|Hippocrepinella hirudinea	1446	1923	912	551	1480	1777	1254	3314	57302	8030	5491	2009
Monothalamea|Monothalamids|CladeD|hirudo-cryst	263	434	268	83	196	402	360	99	190	484	5371	34579
Monothalamea|Monothalamids|CladeE	17	68	37	0	1496	3475	439	0	24	91	52	51
Monothalamea|Monothalamids|CladeE|Micrometula-like	0	0	0	0	0	0	0	0	0	0	516	0
Monothalamea|Monothalamids|CladeE|Nellya rugosa	0	0	0	0	0	0	0	0	110	0	0	0
Monothalamea|Monothalamids|CladeE|Ovammina sp	30	0	0	0	0	0	0	4	0	0	323	19
Monothalamea|Monothalamids|CladeE|Psammophaga crystallifera	0	13	0	11	0	0	0	0	0	0	0	0
Monothalamea|Monothalamids|CladeE|Psammophaga sp	67	183	105	0	3298	6523	114	11	69	148	160	113
Monothalamea|Monothalamids|CladeE|Vellaria pellucidus	430	863	487	183	17584	39130	875	207	373	801	902	791
Monothalamea|Monothalamids|CladeE|Vellaria pellucidus	13	13	15	0	942	1813	22	0	12	36	48	35
Monothalamea|Monothalamids|CladeE|Vellaria pellucidus	0	0	0	0	32	59	0	0	0	0	0	0
Monothalamea|Monothalamids|CladeE|Vellaria pellucidus	0	0	0	0	21	26	0	0	0	0	0	0
Monothalamea|Monothalamids|CladeG|elongate allogromiid	0	64	46	0	0	0	0	0	0	0	0	0
Monothalamea|Monothalamids|CladeJ|allogromiid sp	0	0	0	16	59	167	0	0	0	0	0	0
Monothalamea|Monothalamids|CladeJ|Crithionina granum	0	0	0	0	0	12	18	0	0	0	0	0
Monothalamea|Monothalamids|CladeM|ENV sp	0	0	0	0	6	0	0	0	0	0	0	0
Monothalamea|Monothalamids|CladeM3	0	14	0	0	395	632	14	0	0	12	13	0
Monothalamea|Monothalamids|CladeM3|Gromia-like sp	0	0	0	0	0	15	0	0	0	0	0	0
Monothalamea|Monothalamids|CladeM3|Xeno sp	0	0	0	0	11	0	0	0	0	0	0	0
Monothalamea|Monothalamids|CladeO|Cedhagenia saltatus	508	861	424	208	1446	2789	608	1643	17032	4792	2944	806
Monothalamea|Monothalamids|CladeO|Cedhagenia saltatus	0	0	0	0	0	22	0	0	0	0	0	0
Monothalamea|Monothalamids|CladeO|Ovammina	0	0	0	0	139	452	184	0	0	0	0	0
Monothalamea|Monothalamids|CladeTIN|ENV sp	0	154	108	139	643	674	18	0	0	14	14	0
Monothalamea|Monothalamids|CladeV	482	555	590	130	540	34365	480	97	85	532	1206	1721
Monothalamea|Monothalamids|CladeV|ENV sp	44	48	37	242	355	40	30	0	0	32	68	22
Monothalamea|Monothalamids|CladeV|ENV sp	1134	1911	1347	333	666	1582	1788	440	324	2186	2521	224590
Monothalamea|Monothalamids|CladeY	0	0	0	0	15	50	0	0	0	0	0	0
Monothalamea|Monothalamids|CladeY|ENV sp	11921	10971	736	1923	27195	47453	1274	252	215	958	9172	3731
Monothalamea|Monothalamids|ENFOR2|ENV sp	3341	4269	539	19	90	208	65	22	93	84	2128	1488
Monothalamea|Monothalamids|ENFOR2|ENV sp	0	580	85	0	0	0	0	0	0	0	0	12
Monothalamea|Monothalamids|ENFOR2|ENV sp	0	11	0	0	0	0	0	0	0	0	0	0
Monothalamea|Monothalamids|ENFOR2|ENV sp	0	0	0	0	19	59	0	0	0	0	0	0
Monothalamea|Monothalamids|ENFOR2|ENV sp	0	0	0	0	22	52	0	0	0	0	0	0
Monothalamea|Monothalamids|ENFOR2|ENV sp	0	37	27	0	0	0	0	0	0	0	0	0
Monothalamea|Monothalamids|ENFOR2|ENV sp	0	0	62	0	0	0	0	0	0	0	0	0
Monothalamea|Monothalamids|ENFOR5|ENV sp	0	0	0	47	0	0	0	0	0	0	0	0
Monothalamea|Monothalamids|ENFOR5|ENV sp	0	0	153	52	247	0	0	0	0	0	0	0
Monothalamea|Monothalamids|ENFOR5|Xeno sp	55	120	165	310	10074	96	100	16	0	77	77	91
Monothalamea|Monothalamids|ENFOR5|Xeno sp	0	0	0	0	76	0	0	0	0	0	0	0
Monothalamea|Monothalamids|ENFOR6|Nemogullmia longevariabilis	0	0	0	162	45	94	0	0	0	0	0	0
Monothalamea|Monothalamids|ENFOR6|Xeno sp	11	26	251	628	796	26	42	0	15	23	36	12
Monothalamea|Monothalamids|ENFOR7|Crithionina sp	0	0	0	0	7	0	0	0	0	0	0	0
Monothalamea|Monothalamids|ENFOR7|ENV sp	0	14	0	0	69	0	0	0	0	0	0	0
Monothalamea|Monothalamids|ENFOR7|Globipelorhiza sp	0	0	0	0	148	288	0	0	0	0	0	0
Monothalamea|Monothalamids|ENFOR9|ENVsp	11	622	576	153	71	88	25	0	0	32	0	18
Monothalamea|Monothalamids|ENFOR9|ENV sp	31	215	5151	52	77	52	55	0	0	74	60	57
Monothalamea|Monothalamids|UNDET	0	17	0	0	562	1355	81	0	0	19	19	13
Monothalamea|Monothalamids|UNDET|ENV sp	14299	146310	834	345	1565	4098	1614	308	393	1209	27089	1977
Monothalamea|Monothalamids|UNDET|ENV sp	0	14	0	618	1741	45	19	0	0	0	12	0
Monothalamea|Monothalamids|UNDET|ENV sp	641	4615	31	0	20	44	41	0	0	47	303	68
Monothalamea|Monothalamids|UNDET|ENV sp	118	256	116	206	3083	8026	1444	57	107	233	245	231
Monothalamea|Monothalamids|UNDET|ENV sp	0	31	0	0	224	500	107	0	17	15	1710	39
Monothalamea|Monothalamids|UNDET|ENV sp	0	15	11	0	356	834	0	0	15	13	0	11
Monothalamea|Monothalamids|UNDET|ENV sp	0	0	0	0	0	12	0	0	0	0	0	0
Monothalamea|Monothalamids|UNDET|ENV sp	0	0	0	0	11	60	51	0	0	0	0	0
Monothalamea|Monothalamids|UNDET|saccamminid						16
Monothalamea|Monothalamids|UNDET|saccamminid	0	0	0	41	49	0	0	0	0	0	0	0
Tubothalamea|Miliolida|Cornuspiridae|Cornuspira antarctica	2082	21	13	0	0	28	18	0	18	30	539	1856
Tubothalamea|Miliolida|Cornuspiridae|Cornuspira sp	4384	22	11	0	0	244	15	0	0	24	349	590
Tubothalamea|Miliolida|Hauerinidae|Pyrgo sp	0	0	0	0	0	8	0	0	0	0	0	0
Tubothalamea|Miliolida|Hauerinidae|Quinqueloculina sp	0	0	0	0	16	19	0	0	0	0	0	0
Tubothalamea|Miliolida|Miliamminidae|Miliammina sp	0	361	102	0	0	0	0	0	0	0	0	0
Tubothalamea|Miliolida|Ophtalmidiidae|Spirophtalmidium sp	1687	301	0	0	1	0	23	0	0	17	11	832
Tubothalamea|Miliolida|Ophtalmidiidae|Spirophtalmidium sp	35	13	0	0	250	353	0	0	0	0	114	12
Tubothalamea|Miliolida|Soritidae|Androsina lucasi	0	0	18	0	0	0	0	0	0	0	0	0
Tubothalamea|Miliolida|Soritidae|Spirolina	0	22	20	0	0	0	0	0	0	0	0	0
Tubothalamea|Miliolida|Soritidae|Spirolina					11	42	14
Undetermined	0	0	0	0	0	31	0	0	0	0	0	0
Undetermined	0	19	42	23	0	0	0	0	0	0	0	0
Undetermined	0	454	65	45	144	13	11	0	0	0	12	0
Undetermined	0	0	0	0	56	0	0	0	0	0	0	0
Undetermined	320	84	66	64	848	1646	506	0	0	41	87	44
Undetermined	0	0	0	0	812	0	0	0	0	0	0	0
Undetermined	8473	90	22	42	95	174	56	44	84	92	10362	330
Undetermined	315	6851	3470	121546	8795	3168	800	734	1872	1827	2332	1546
Undetermined	499	13454	6395	257980	12295	6366	1570	1614	4119	3998	4963	3466
Undetermined	0	19	30	98	77	11	0	0	0	0	0	0
Undetermined	0	0	0	0	124	197	0	0	0	0	0	0
Undetermined	3316	106	36	33	91	105	93	19	65	128	4450	2062
Undetermined	0	0	0	0	31	48	0	0	0	0	0	0
Undetermined	0	63	120	133	33	0	0	0	0	0	0	0
Undetermined	0	11	0	0	206	302	0	0	0	12	0	0
Undetermined	0	0	0	0	77	117	0	0	0	0	0	0
Undetermined	0	0	0	0	0	25	14	0	0	0	0	0
Undetermined	0	0	0	41	0	0	0	0	0	0	0	0
Undetermined	0	52	18	52	154	0	0	0	0	0	0	0
Undetermined	0	37	28	0	0	0	0	0	0	0	0	0
Undetermined	0	0	0	0	52	95	0	0	0	0	0	0
Undetermined	0	0	0	0	23	25	0	0	0	0	0	0
Undetermined	0	57	15	0	0	0	0	0	0	0	0	0
Undetermined	0	0	0	78	109	212	0	0	0	0	0	0
Undetermined	115	487	813	335	9917	4969	204	55	70	180	191	214
Undetermined	0	48	73	79	40	26	11	0	0	11	11	15
Undetermined	27	3042	32	0	12	34	40	0	0	42	38	33
Undetermined	0	0	0	108	140	286	0	0	0	0	0	0
Undetermined	0	0	0	17	0	0	0	0	0	0	0	0
Undetermined	0	17	0	0	33	461	464	0	0	11	27	14
Undetermined	0	158	11	15	0	0	0	0	0	0	0	0
Undetermined	0	0	0	0	12	22	16	0	0	0	0	0
Undetermined	0	0	0	0	23	53	0	0	0	0	0	0
Undetermined	0	0	0	0	133	262	0	0	0	0	0	0
Undetermined	0	0	0	0	0	13	0	0	0	0	0	0
Undetermined	0	0	0	0	12	59	44	0	0	0	0	0
Undetermined	184	4617	7517	165	494	332	272	101	138	367	352	349
Undetermined	0	0	0	0	13	0	0	0	0	0	0	0
Undetermined	0	0	0	0	109	272	0	0	0	0	0	0
Undetermined	0	0	0	0	0	16	0	0	0	0	0	0
Undetermined	0	0	27	0	0	0	0	0	0	0	0	0
Undetermined	0	48	0	0	0	0	0	0	0	0	0	0
Undetermined	0	0	26	0	0	0	0	0	0	0	0	0
Undetermined	0	0	0	0	28	58	0	0	0	0	0	0
Undetermined	0	12	0	0	0	0	0	0	0	0	0	0
Undetermined	0	0	0	0	56	53	0	0	0	0	0	0
Undetermined	84	0	0	0	0	0	0	0	0	0	0	36
Undetermined	0	21	59	0	0	0	0	0	0	0	0	0
Undetermined	0	20	0	108	0	0	0	0	0	0	0	0
Undetermined	0	0	0	0	43	78	0	0	0	0	0	0
Undetermined	0	0	0	0	262	490	13	0	0	11	0	13
Undetermined	31	84	54	12	1671	3580	58	0	42	87	93	78
Undetermined	0	0	0	0	84	184	0	0	0	0	0	0
Undetermined	410	0	0	0	0	0	0	0	0	0	0	229
Undetermined	0	778	270	0	22	33	21	0	0	28	39	29
Undetermined	0	0	0	0	69	123	0	0	0	0	0	0
Undetermined	0	11	17	0	0	0	0	0	0	0	0	0
Undetermined	22	54	25	12	466	1364	446	13	23	24	69	33
Undetermined	0	11	28	0	0	0	0	0	0	0	0	0
Undetermined	0	0	0	0	24	0	0	0	0	0	0	0
Undetermined	0	0	0	0	0	171	0	0	0	0	0	0
Undetermined	0	0	0	0	26	60	23	0	0	0	0	0
Undetermined	0	0	0	0	22	38	0	0	0	0	0	0
Undetermined	0	0	0	0	38	82	0	0	0	0	0	0
Undetermined	0	0	20	0	0	0	0	0	0	0	0	0
Undetermined	0	73	62	0	0	0	0	0	0	0	0	0
Undetermined	12	0	0	0	0	0	0	0	0	0	0	0
Undetermined	58	195	72	0	3294	6435	573	12	84	142	201	135
Undetermined	0	63	164	0	0	0	0	0	0	0	0	0
Undetermined	0	0	170	0	0	0	0	0	0	0	0	0
Undetermined	0	0	0	0	0	21	32	0	0	0	0	0
Undetermined	0	0	0	0	0	13	23	0	0	0	0	0
Undetermined	0	23	0	0	0	0	0	0	0	0	0	0
Undetermined	0	0	0	0	11	27	0	0	0	0	0	0
Undetermined	0	0	20	0	0	0	0	0	0	0	0	0
Undetermined	0	0	0	0	26	35	0	0	0	0	0	0
Undetermined	0	0	15	0	0	0	0	0	0	0	0	0
Undetermined	0	13	25	0	0	0	0	0	0	0	0	0
Undetermined	14	161	207	285	74	82	34	22	40	59	84	50
Undetermined	0	0	0	208	0	0	0	0	0	0	0	0
Undetermined	0	0	0	0	85	164	0	0	0	0	0	0
Undetermined	0	0	18	0	0	0	0	0	0	0	0	0
Undetermined	0	0	0	0	24	46	0	0	0	0	0	0
Undetermined	0	25	0	0	309	755	113	0	19	23	37	26
Undetermined	0	0	0	1	0	10	0	0	0	4	0	0
Undetermined	0	0	10	0	0	0	0	0	0	0	0	0
Undetermined	0	0	0	0	0	0	0	0	0	0	0	10
Undetermined	0	0	0	0	0	0	0	0	0	0	9	0
Undetermined	0	0	0	0	0	0	0	8	0	0	0	0
Undetermined	0	0	0	0	0	0	0	0	0	7	0	0
Undetermined	0	0	0	0	0	7	0	0	0	0	0	0
Undetermined	0	0	0	0	0	0	0	0	0	0	6	0
Undetermined	0	0	0	0	4	0	0	0	0	0	0	0
Undetermined	2	0	0	0	0	0	0	0	0	0	0	0
Undetermined	1	0	0	0	0	0	0	0	0	0	0	0
Undetermined	1	0	0	0	0	0	0	0	0	0	0	0
Undetermined	0	1	0	0	0	0	0	0	0	0	0	0
Undetermined	1	0	0	0	0	0	0	0	0	0	0	0
Undetermined	0	0	0	0	0	0	0	1	0	0	0	0
Undetermined	0	0	0	0	0	0	0	1	0	0	0	0
Undetermined	0	0	0	0	46	55	0	0	0	0	0	0
Undetermined	0	0	0	45	0	0	0	0	0	0	0	0
Undetermined	0	0	0	0	0	12	0	0	0	0	0	0
Undetermined	0	0	0	0	182	402	0	0	0	0	0	0
Undetermined	0	36	209	28	1160	12	21	0	0	0	0	15
Undetermined	43	95	46	11	1533	2371	58	13	28	102	95	87
Undetermined	0	16	16	92	1917	19	19	0	0	26	13	18
Undetermined	155	0	0	0	0	0	0	0	0	0	0	0
Undetermined	0	0	0	0	0	100	119	0	0	0	0	0
Undetermined	693	1403	598	2048	142593	582	869	204	138	716	577	677
Undetermined	0	0	0	0	126	233	0	0	0	0	0	0
Undetermined	0	0	0	0	144	0	0	0	0	0	0	0
Undetermined	17	44	18	0	725	1539	175	0	12	25	39	23
Undetermined	0	0	0	0	72	109	0	0	0	0	0	0
Undetermined	0	676	334	0	0	11	0	0	0	0	0	0
Undetermined	0	119	0	0	0	0	0	0	0	0	0	0
Undetermined	0	236	226	248	84	90	32	38	73	110	126	71
Undetermined	13	169	525	110	2444	20	28	13	0	25	20	25
Undetermined	0	18	0	1909	71	59	0	0	19	13	21	0
Undetermined	26	0	0	0	0	0	0	0	0	0	0	0
Undetermined	308	720	388	201	410	15533	24412	228	357	733	706	623
Undetermined	0	0	0	0	183	376	89	0	0	0	0	0
Undetermined	13	60	45	0	910	1815	23	0	13	35	52	43
Undetermined	0	0	0	0	56	212	208	0	0	0	0	0
Undetermined	0	17	39	382	1074	0	12	0	0	0	0	0
Undetermined	36	1197	325	1237	1707	120	44	0	35	73	73	55
Undetermined	0	0	0	0	23	22	0	0	0	0	0	0
Undetermined	0	0	0	0	0	13	0	0	0	0	0	0
Undetermined	0	0	0	19	0	0	0	0	0	0	0	0
Undetermined	0	0	0	62	0	0	0	0	0	0	0	0
Undetermined	0	18	13	49	1053	11	16	0	0	0	18	12
Undetermined	0	0	0	0	51	69	0	0	0	0	0	0
Undetermined	0	0	0	0	25	33	0	0	0	0	0	0
Undetermined	0	0	0	0	236	357	0	0	0	0	13	11
Undetermined	0	0	0	0	67	117	0	0	0	0	0	0
Undetermined	0	0	0	0	0	29	0	0	0	0	0	0
Undetermined	0	0	0	0	31	35	0	0	0	0	0	0
Undetermined	0	0	0	30	0	0	0	0	0	0	0	0
Undetermined	0	0	0	16	0	0	0	0	0	0	0	0
Undetermined	0	0	0	0	160	222	0	0	0	0	0	0
Undetermined	0	13	0	0	11	0	0	0	0	0	0	0
Undetermined	0	0	0	0	198	326	0	0	0	0	0	0
Undetermined	26	38	21	0	575	1296	274	0	24	40	40	36
Undetermined	85	145	85	17	1711	3209	954	52	74	163	176	137
Undetermined	57	148	74	16	768	2374	1245	14	54	136	157	103
Undetermined	0	1598	2774	29	1138	0	0	0	0	0	0	0
