# Supplementary material for: Palaeoceanographic changes in Hornsund Fjord (Spitsbergen, Svalbard) overthe last millennium: new insights from ancient DNA
Source: Copernicus journal article supplement (doi:10.5194/cp-12-1459-2016), 2016-07-11
Supplement: Supplementary file [file cp-12-1459-2016-supplement-title-page.pdf › cp-12-1459-2016-supplement-title-page.pdf]

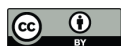

## *Supplement of*

# **Palaeoceanographic changes in Hornsund Fjord (Spitsbergen, Svalbard) over the last millennium: new insights from ancient DNA**

**Joanna Pawłowska et al.**

*Correspondence to:* Joanna Pawłowska (pawlowska@iopan.pl)

- cp-12-1459-2016-supplement-title-page.pdf
- Table S1.xlsx
- Table S2.xlsx

The copyright of individual parts of the supplement might differ from the CC-BY 3.0 licence.
